# Supplementary material
Source: Royal Society of Chemistry journal article supplement (doi:10.1039/d6ob00261g)
Supplement: d6ob00261g1.pdf [file d6ob00261g1.pdf]

## A Five-Year Perspective on DMAP as a Cutting-Edge Reagent in Heterocyclic Ring Formation

Murali Mohan Achari Kamsali,<sup>1</sup> Laxman Mahadev Alakonda,<sup>2</sup> Mohammed Mujahid Alam,<sup>3</sup> and Ravi Varala<sup>4\*</sup>

<sup>1</sup>Department of Chemistry, Sri Venkateswara College, University of Delhi, New Delhi-110021, India

<sup>2</sup>School of Pharmacy, College of Health Sciences, University of Wyoming, Laramie, WY 82071, USA

<sup>3</sup>Department of Chemistry, College of Science, King Khalid University, Abha, 61421, Saudi Arabia

<sup>4</sup>Scrips Pharma, Mallapur, Hyderabad 500076, Telangana, India; Research Fellow in Health Sciences, INTI International University, 71800 Nilai, Malaysia & Research Fellow, Shinawatra University, Pathum Thani 12160, Thailand; Ph: +91-9618286529; [ravivarala@gmail.com](mailto:ravivarala@gmail.com)

**Table 1. Summary of the DMAP promoted heterocyclic ring formations-Nutshell**

| Entry | Type of Heterocycle Synthesized                      | Role of DMAP | Comparison with other similar reagents                                                                                                                                                                        | Reaction conditions                                                                                                                                                                                 | Reference |
|-------|------------------------------------------------------|--------------|---------------------------------------------------------------------------------------------------------------------------------------------------------------------------------------------------------------|-----------------------------------------------------------------------------------------------------------------------------------------------------------------------------------------------------|-----------|
| 1     | <b>Five-Membered Heterocycles</b>                    |              |                                                                                                                                                                                                               |                                                                                                                                                                                                     |           |
|       | Synthesis of 1,3,4-oxadiazoles                       | Reagent      | DMAP excelled (92%) over DBU (25%), pyridine (5%), Et <sub>3</sub> N (39%), and K <sub>2</sub> CO <sub>3</sub> (50%)                                                                                          | DMAP (1.0 equiv.), CH <sub>3</sub> CN, O <sub>2</sub> , 70 °C, 15 h                                                                                                                                 | 38        |
|       | Synthesis of sulfur heterocycles                     | Catalyst     | DMAP excelled (67%) over DBU (26%), pyridine (33%), or DABCO (38%)                                                                                                                                            | DMAP (10 mol%), DCC, CH <sub>3</sub> CN, rt, 16 h                                                                                                                                                   | 39        |
|       | Synthesis of substituted imidazoles                  | Reagent      | DMAP excelled (87% yield) over DBU (17%), NaOAc (35%), K <sub>2</sub> CO <sub>3</sub> (59%), NaOH (42%), NaOEt (31%), and Et <sub>3</sub> N (16%)                                                             | I <sub>2</sub> (1 equiv.), DMAP (1 equiv.), PhCl, 110 °C, 6 h                                                                                                                                       | 41        |
|       | Synthesis of 1,2,5-thiadiazoles/1,2,4-thiadiazolones | Reagent      | DMAP excelled (68% yield) over NaOAc (ND), imidazole (32%), pyridine (56%), and Et <sub>3</sub> N (66%)                                                                                                       | TFAA (4.0 equiv.), DMAP (2.5 equiv.), Na <sub>2</sub> SO <sub>4</sub> (2.5 equiv.), DCE, 0-80 °C/ TFAA (3.5 equiv.), DMAP (2 equiv.), NaOAc (2 equiv.), H <sub>2</sub> O (1.1 equiv.), DCE, 0-80 °C | 43        |
|       | Synthesis of 1,5-disubstituted tetrazoles            | Reagent      | DMAP (71%), Et <sub>3</sub> N (16%), DBU (trace), pyridine (56%), and DABCO (56%)                                                                                                                             | DMAP (2.0 equiv), THF, reflux, 16 h                                                                                                                                                                 | 45        |
|       | Synthesis of substituted 2-oxazolines                | Reagent      | DMAP excelled (63%) over Et <sub>3</sub> N (13%), DABCO (28%), DBU (<1%), DIPEA (21%), Na <sub>2</sub> CO <sub>3</sub> (18%), K <sub>2</sub> CO <sub>3</sub> (6%), and Cs <sub>2</sub> CO <sub>3</sub> (<1%). | DMAP (2 equiv.), toluene, N <sub>2</sub> , reflux, 12 h                                                                                                                                             | 47        |
|       | 2-(3H)-oxazolones                                    | Promoter     | DMAP excelled (77%) over                                                                                                                                                                                      | 1. FeCl <sub>3</sub> (5 mol%), CH <sub>3</sub> CN,                                                                                                                                                  | 48        |

|   |                                                                 |             |                                                                                                                                                                                                                                                                                            |                                                                                                                                |    |
|---|-----------------------------------------------------------------|-------------|--------------------------------------------------------------------------------------------------------------------------------------------------------------------------------------------------------------------------------------------------------------------------------------------|--------------------------------------------------------------------------------------------------------------------------------|----|
|   |                                                                 |             | TsOH·H <sub>2</sub> O (64%), CSA (73%), and Et <sub>3</sub> N (38%) for isomerization                                                                                                                                                                                                      | reflux, 1 h, 2. DMAP (30 mol%), 40 °C                                                                                          |    |
| 2 | <b>Six-Membered Heterocycles</b>                                |             |                                                                                                                                                                                                                                                                                            |                                                                                                                                |    |
|   | Synthesis of tetrahydropyridazine derivatives                   | Catalyst    | DMAP was uniquely effective (62%), whereas DABCO, pyridine, Cs <sub>2</sub> CO <sub>3</sub> , and tertiary phosphines were inactive.                                                                                                                                                       | DMAP (20 mol%), DCE, 0 °C, 12 h                                                                                                | 50 |
|   | Synthesis of 2-pyrones derivatives                              | Catalyst    | DMAP proved optimal (60%) over phosphines (PMe <sub>3</sub> 47%, PBu <sub>3</sub> 54%) and DABCO (48%), enabling efficient bromide displacement and cyclization                                                                                                                            | DMAP (20 mol%), KOH (1.5 equiv.), 1,4-dioxane, 60 °C, 4 A° MS                                                                  | 52 |
|   | Synthesis of polyfunctionalized 2-amino-3-cyano-4H-pyran esters | Promoter    | DMAP (57%) as optimal, outperforming Et <sub>3</sub> N (48%), DIPEA (44%), DABCO (35%), DBU (41%), K <sub>2</sub> CO <sub>3</sub> (31%), and Cs <sub>2</sub> CO <sub>3</sub> (37%)                                                                                                         | DMAP (40 mol%), EtOAc, 40 °C                                                                                                   | 54 |
|   | Synthesis of 1,3,4-oxadiazines                                  | Promoter    | DMAP (75%) as optimal, outperforming pyridine (13%), DBU (0%)                                                                                                                                                                                                                              | DMAP (30 mol%), toluene, rt, N <sub>2</sub>                                                                                    | 57 |
| 3 | <b>[5,6]-Fused Heterocyclic Ring Systems</b>                    |             |                                                                                                                                                                                                                                                                                            |                                                                                                                                |    |
|   | Synthesis of pyranopyrazoles                                    | Catalyst    | DMAP outperformed piperidine (68%), DBU (74%), DABCO (79%), and NEt <sub>3</sub> (83%), giving 92% yield                                                                                                                                                                                   | DMAP (5 mol%), EtOH, rt                                                                                                        | 60 |
|   | Synthesis of substituted 2-hydroxybenzylideneindenediones       | Promoter    | DMAP provides the best yield (62%), while Et <sub>3</sub> N (54%) and L-proline (51%) are comparable but slightly less effective. In contrast, inorganic bases (K <sub>2</sub> CO <sub>3</sub> 27%, NaOAc 25%) and piperidine (15%) perform poorly, likely due to competing side reactions | DMAP (30 mol%), EtOH, 70 °C, 2 h                                                                                               | 62 |
| 4 | <b>[6,6]-Fused Heterocyclic Ring Systems</b>                    |             |                                                                                                                                                                                                                                                                                            |                                                                                                                                |    |
|   | Synthesis of substituted 2-alkoxy quinolines                    | Co-catalyst | DMAP (62%) outperforming pyridine (21%), NMP (0%), and other pyridine derivatives which give significantly lower                                                                                                                                                                           | CuCl (5 mol%), DMAP (20 mol%), NaHCO <sub>3</sub> (1.0 equiv), 1,10-Phenanthroline (7.5 mol%), CH <sub>3</sub> CN (0.2 M), Ar, | 64 |

|   |                                                                              |          |                                                                                                                                                                                                                                                                                                          |                                                                                                                              |    |
|---|------------------------------------------------------------------------------|----------|----------------------------------------------------------------------------------------------------------------------------------------------------------------------------------------------------------------------------------------------------------------------------------------------------------|------------------------------------------------------------------------------------------------------------------------------|----|
|   |                                                                              |          | or negligible yields                                                                                                                                                                                                                                                                                     | 70 °C, 12 h                                                                                                                  |    |
|   | Synthesis of quinazolinones derivatives                                      | Promoter | Notably, DMAP is essential, as other nucleophilic catalysts (e.g., DABCO, imidazole) are ineffective                                                                                                                                                                                                     | DMAP (50 mol%), H <sub>2</sub> O (2.0 equiv)<br>K <sub>3</sub> PO <sub>4</sub> (3.0 equiv), <i>t</i> -BuOH (0.2 M), rt, 18 h | 66 |
|   | Synthesis of 3-cyano-2H-chromenes                                            | Reagent  | DMAP with highest yield (57%), outperforming DABCO (51%) quinuclidine (69%), 3-quinuclidinol (60%), and PPY (48%), while several strong bases (TBD, DBN, MTBD) and quinine are ineffective or poor                                                                                                       | DMAP (2.0 equiv), neat, 70 °C, 18 h                                                                                          | 68 |
| 5 | <b>[6,6,6]-Fused Heterocyclic Ring Systems</b>                               |          |                                                                                                                                                                                                                                                                                                          |                                                                                                                              |    |
|   | Synthesis of 1,3-diazaphenothiazines                                         | Reagent  | K <sub>2</sub> CO <sub>3</sub> (21%), <i>t</i> -BuONa (trace), Et <sub>3</sub> N (56%), EtNH <sub>2</sub> (52%), tripropylamine (TPA, 48%), <i>N,N</i> -diisopropylethylamine (DIPEA, 67%), and 4-dimethylaminopyridine (DMAP, 78%) were tested, and DMAP achieved the best result in 78% isolated yield | DMAP (3 equiv.), EtOH, O <sub>2</sub> (balloon), 80 °C, 2 h                                                                  | 70 |
|   | Synthesis of functionalized benzo[ <i>c</i> ][2,7]naphthyridine skeletons    | Reagent  | Despite high selectivity, the catalytic efficiency is modest, with DMAP giving only 36% yield, while DABCO and phosphine catalysts are ineffective                                                                                                                                                       | DMAP (1.0 equiv), CH <sub>2</sub> Cl <sub>2</sub> , rt, 48 h                                                                 | 72 |
|   | Synthesis of substituted coumarins                                           | Catalyst | DMAP (85%) significantly outperforms DABCO (40%) and other bases, while DBU diverts the reaction pathway                                                                                                                                                                                                 | DMAP (20 mol%), K <sub>2</sub> CO <sub>3</sub> (2.0 equiv), toluene (0.1 M), 130 °C, 6-8 h                                   | 74 |
|   | Synthesis of benzophenazine and pyrimidine tethered tri-substituted methanes | Catalyst | DMAP (97%) outperforming other catalysts (I <sub>2</sub> 63%, CAN 57%, DABCO 67%)                                                                                                                                                                                                                        | DMAP (10 mol%), Ultrasound-assisted, H <sub>2</sub> O, 3.5-5 h, RT                                                           | 76 |
|   | Synthesis of 1,4-pyranonaphthoquinones                                       | Catalyst | DMAP outperforming pyridine (10%), DABCO (60%), DBU (5%), and Et <sub>3</sub> N (5%)                                                                                                                                                                                                                     | DMAP (20 mol%), microwave (80 °C, 150 W), EtOH, 20 min                                                                       | 78 |
|   | Synthesis of benzo[ <i>c</i> ]cinnolines derivatives                         | Ligand   | DMAP acted as an effective ligand                                                                                                                                                                                                                                                                        | CuBr (5 mol%), DMAP (10 mol%), 1,4-dioxane, 100 °C,                                                                          | 80 |

|   |                                                                                                                             |          |                                                                                                                                                                                                                                                                                                                                            |                                                                             |    |
|---|-----------------------------------------------------------------------------------------------------------------------------|----------|--------------------------------------------------------------------------------------------------------------------------------------------------------------------------------------------------------------------------------------------------------------------------------------------------------------------------------------------|-----------------------------------------------------------------------------|----|
|   |                                                                                                                             |          |                                                                                                                                                                                                                                                                                                                                            | O <sub>2</sub> balloon                                                      |    |
| 6 | <b>Three Fused Heterocycles with Mixed Ring Sizes (5-6-7/10)</b>                                                            |          |                                                                                                                                                                                                                                                                                                                                            |                                                                             |    |
|   | Selective synthesis of furan-3(2 <i>H</i> )-one fused 5- and 7-membered rings                                               | Base     | Among the bases tested K <sub>2</sub> CO <sub>3</sub> (35%), <i>t</i> -BuOK (0%), DABCO (30%), DBU (12%), and DMAP afforded the highest yield (62%)                                                                                                                                                                                        | DMAP (2 equiv.), DMF, rt, 12 h in sealed tube                               | 83 |
| 7 | <b>Spiroheterocycles: Synthesis of pyrazolinone-containing dispirocyclic compounds - [5,5]-Spiroheterocyclic Frameworks</b> |          |                                                                                                                                                                                                                                                                                                                                            |                                                                             |    |
|   | Synthesis of benzofuran derivatives                                                                                         | Reagent  | DMAP was optimal (70 in DCE) over inorganic (Na <sub>2</sub> CO <sub>3</sub> /K <sub>2</sub> CO <sub>3</sub> 50-52%, Cs <sub>2</sub> CO <sub>3</sub> 41%) and organic bases (DABCO 31%, Et <sub>3</sub> N 45%, DBU 32%, TMG 36%, NaHCO <sub>3</sub> 42%), likely due to balanced nucleophilicity for sulfone displacement and cyclization. | DMAP (1.0 equiv), DCE, rt, 20 h                                             | 85 |
|   | Synthesis of 1,3-dioxolane skeletons                                                                                        | Catalyst | Among the catalysts screened, DMAP (72%) outperformed several other catalysts such as DABCO (trace), DBU (67%), TPP (NR), 4-pyrrolidinopyridine (62%), (1-pyridin-4-yl)piperidine (64%) and 4-(4-pyridinyl)morpholine (67%).                                                                                                               | DMAP (20 mol%), K <sub>2</sub> CO <sub>3</sub> (50 mol%), DCM, -20 °C, 48 h | 87 |
| 8 | <b>[5,6]-Spiroheterocyclic Frameworks</b>                                                                                   |          |                                                                                                                                                                                                                                                                                                                                            |                                                                             |    |
|   | Synthesis of spiro- and 3-methylene-hydroquinoline-indandiones                                                              | Catalyst | Using DMAP, the aza-1,4-/1,6-addition pathway could be selectively modulated, delivering products in 40-99% yields with excellent diastereoselectivities. Stronger bases such as DBU and TMG favored formation of 3-methylenehydroquinoline-indandiones in lower yields (25% and 55%, respectively).                                       | DMAP (20 mol%), CH <sub>2</sub> Cl <sub>2</sub> , 30 °C                     | 89 |

|    |                                                                            |          |                                                                                                                                                                                                                                                     |                                                                  |     |
|----|----------------------------------------------------------------------------|----------|-----------------------------------------------------------------------------------------------------------------------------------------------------------------------------------------------------------------------------------------------------|------------------------------------------------------------------|-----|
|    |                                                                            |          | (25% and 55%, respectively)                                                                                                                                                                                                                         |                                                                  |     |
|    | Synthesis of [3+3] spiroannulation reactions of isatin                     | Catalyst | Bases such as DBU, Et <sub>3</sub> N, PPh <sub>3</sub> , and imidazole produced only trace amounts of product, where as DMAP could yield 83% of the desired product.                                                                                | DMAP (20 mol%), Toluene, rt                                      | 91  |
| 9  | <b>[5,7]-Spiroheterocyclic Frameworks</b>                                  |          |                                                                                                                                                                                                                                                     |                                                                  |     |
|    | Synthesis of spiro[pyrazolone-azepine] scaffolds                           | Catalyst | DMAP gave yields up to 93%, and is uniquely effective while others are PPh <sub>3</sub> , DABCO, and Et <sub>3</sub> N were ineffective.                                                                                                            | DMAP (20 mol%). Cs <sub>2</sub> CO <sub>3</sub> , toluene, 40 °C | 94  |
|    | Synthesis of ninhydrin-derived MBH carbonates                              | Catalyst | DMAP was superior (82%); PPh <sub>3</sub> and Et <sub>3</sub> N were ineffective.                                                                                                                                                                   | DMAP (20 mol%). CHCl <sub>3</sub> , 40 °C                        | 96  |
|    | Synthesis of spiro[cyclohepta[c]pyrrole-6,2'-indene]-8-carboxylates        | Catalyst | DMAP is critically superior (75%) to ineffective conventional amines (DABCO, DBU, quinuclidine), DMAP's unique nucleophilicity enables this higher-order mode.                                                                                      | DMAP (10 mol%). THF, rt, 24 h                                    | 97  |
| 10 | <b>[5,5,5]-Spiroheterocyclic Frameworks</b>                                |          |                                                                                                                                                                                                                                                     |                                                                  |     |
|    | Synthesis of multifunctional spiropyrazole derivatives                     | Catalyst | Screening of tertiary amine catalysts demonstrated that only DMAP (98% yield) was effective, whereas DABCO, DBU, β-ICD, and quinine were inactive                                                                                                   | DMAP (20 mol%). CH <sub>2</sub> Cl <sub>2</sub> , rt, 48 h       | 98  |
|    | Diastereo- and regioselective synthesis of bis-spiroheterocyclic oxindoles | Catalyst | DMAP proved optimal (91%) versus milder bases (Et <sub>3</sub> N 80%, DABCO 79%, DIPEA 75%, K <sub>2</sub> CO <sub>3</sub> /Cs <sub>2</sub> CO <sub>3</sub> 56-77%) and stronger ones (DBU 52%, NaOEt 25%), revealing alkalinity sweet-spot control | DMAP (20 mol%). EtOH, rt                                         | 100 |
|    | Synthesis of dispirocyclic compounds                                       | Catalyst | DMAP (83%) clearly outperformed the alternative catalysts tested such as DABCO or PCy <sub>3</sub> (trace), TPP (40%).                                                                                                                              | DMAP (20 mol%). CH <sub>2</sub> Cl <sub>2</sub> , rt, 12 h       | 101 |

|    |                                                       |          |                                                                                                                                                                                        |                                                                                          |     |
|----|-------------------------------------------------------|----------|----------------------------------------------------------------------------------------------------------------------------------------------------------------------------------------|------------------------------------------------------------------------------------------|-----|
|    | Synthesis of contiguous dispiroheterocyclic scaffolds | Catalyst | DMAP (95%) slightly outperformed other effective bases (DABCO 90%, Et <sub>3</sub> N 68%, DBU 70%; DPP inactive), underscoring its catalytic efficiency in this racemic transformation | DMAP (10 mol%), CH <sub>2</sub> Cl <sub>2</sub> , rt                                     | 103 |
| 11 | <b>[5,5,6]-Spiroheterocyclic Frameworks</b>           |          |                                                                                                                                                                                        |                                                                                          |     |
|    | Synthesis of bispiro(oxindole)s                       | Catalyst | DMAP gave yields (72%) with excellent diastereoselectivity (>20:1 dr). Uniquely effective versus alternatives pyridine/DBU gave traces, PPh <sub>3</sub> /DABCO failed                 | DMAP (10 mol%), CH <sub>2</sub> Cl <sub>2</sub> , rt, 6 h                                | 105 |
| 12 | <b>Miscellaneous Heterocyclic Ring Formations</b>     |          |                                                                                                                                                                                        |                                                                                          |     |
|    | Synthesis of C-3 aminoquinolin-2(1 <i>H</i> )-ones    | Base     | DMAP (82%) outperformed other base catalysts such as DABCO (33%), DIPEA (63%), K <sub>2</sub> CO <sub>3</sub> (34%).                                                                   | DMAP (1.2 equiv.), Ir(dFppy) <sub>3</sub> (2 mol%), CH <sub>3</sub> CN, H <sub>2</sub> O | 107 |
